# Supplementary material for: EF-Hand-Binding Secreted Protein Hdh-SMP5 Regulates Shell Biomineralization and Responses to Stress in Pacific Abalone, Haliotis discus hannai
Source: MDPI journal article supplement (doi:10.3390/cimb45120629), 2023-12-13
Supplement: s1 [file s1]

**Table S1:** Amino acid composition of Hdh-SMP5 in Pacific abalone

| Amino acids | number | Percentage |
|-------------|--------|------------|
| Ala (A)     | 8      | 6.0%       |
| Arg (R)     | 3      | 2.2%       |
| Asn (N)     | 6      | 4.5%       |
| Asp (D)     | 15     | 11.2%      |
| Cys (C)     | 1      | 0.7%       |
| Gln (Q)     | 4      | 3.0%       |
| Glu (E)     | 9      | 6.7%       |
| Gly (G)     | 6      | 4.5%       |
| His (H)     | 5      | 3.7%       |
| Ile (I)     | 9      | 6.7%       |
| Leu (L)     | 11     | 8.2%       |
| Lys (K)     | 6      | 4.5%       |
| Met (M)     | 2      | 1.5%       |
| Phe (F)     | 10     | 7.5%       |
| Pro (P)     | 4      | 3.0%       |
| Ser (S)     | 12     | 9.0%       |
| Thr (T)     | 5      | 3.7%       |
| Trp (W)     | 2      | 1.5%       |
| Tyr (Y)     | 4      | 3.0%       |
| Val (V)     | 12     | 9.0%       |

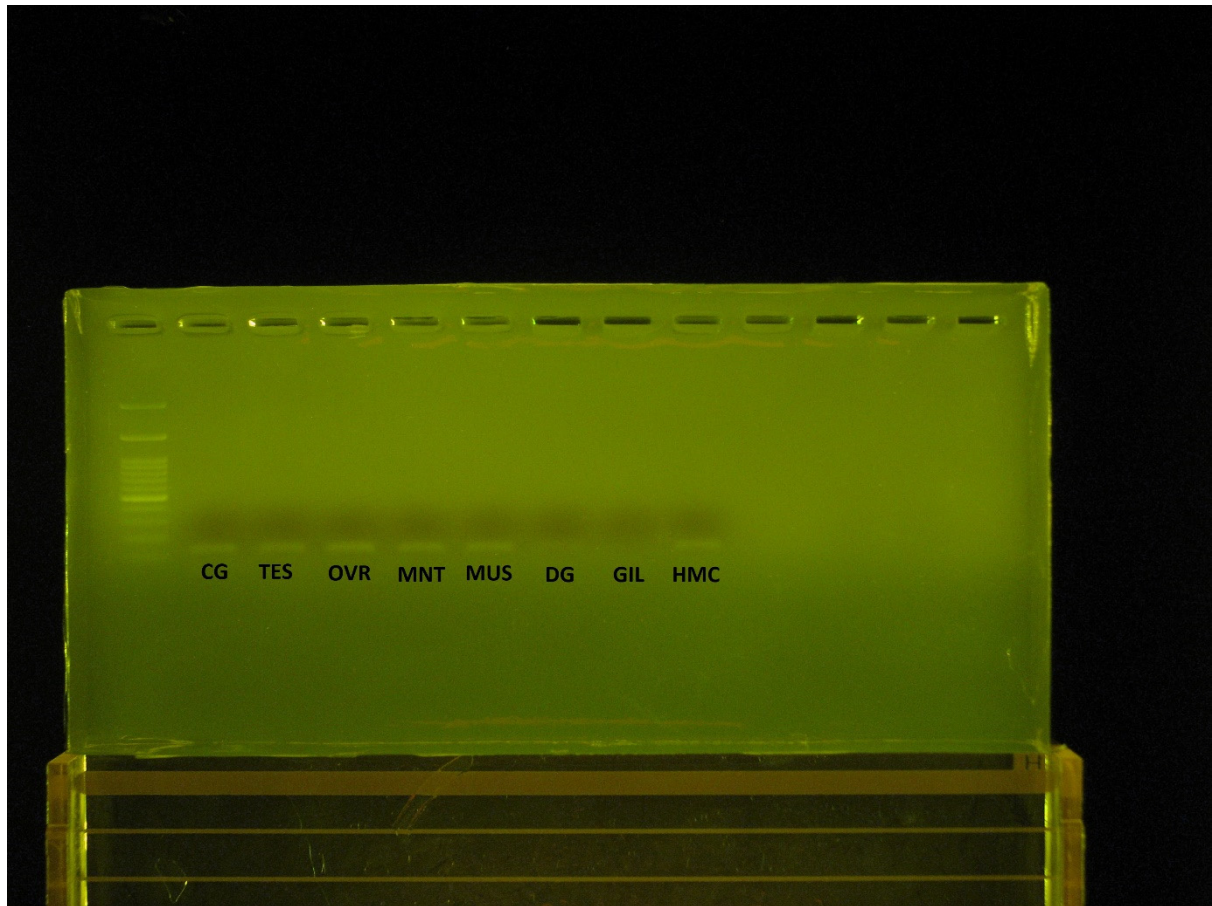

**Figure S1:** Tissue specific Semi-quantitative expression of *Hdh-SMP5* in Pacific abalone

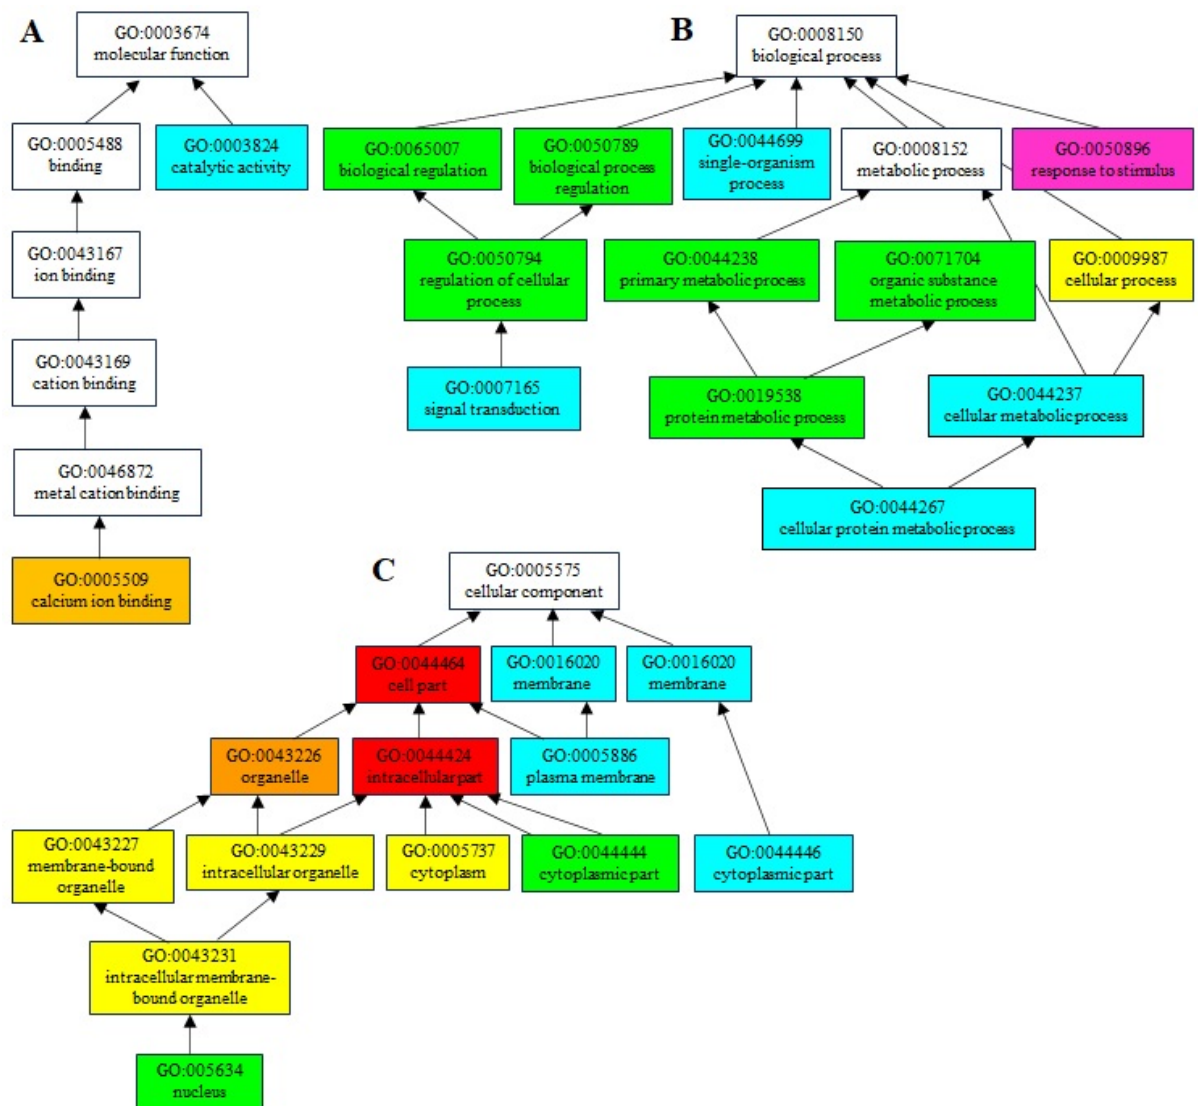

**Figure S2:** Function (gene ontology) analysis of *Hdh-SMP5* in Pacific abalone: S2A) molecular function, S2B) biological process, S2C) cellular component
